# Supplementary material for: Distinct genetic alteration profiles of acute myeloid leukemia between Caucasian and Eastern Asian population
Source: PubMed Central journal article supplement (PMC5807853; doi:10.1186/s13045-018-0566-8), 2018-02-10
Supplement: 13045_2018_566_MOESM1_ESM.pdf [file 13045_2018_566_MOESM1_ESM.pdf]

Table S1-7

Table S1. CBF ratios in European, American, and Eastern Asian cohorts

|                                 | China1* | China2[1] | Korea[2] | JALSG<br>AML201[<br>3] | ECOG190<br>0 [4] | MRC<br>AML15<br>[5] | UK NCRI<br>AML17[6] | HOVON/SA<br>KK AML- 42<br>[7] | German<br>AML2003[<br>8] |
|---------------------------------|---------|-----------|----------|------------------------|------------------|---------------------|---------------------|-------------------------------|--------------------------|
| Median age, years               | 36      | 37        | 43       | 47                     | 48               | 49                  | 53                  | 49                            | 48                       |
| Age range, years                | 15-55   | 14-59     | 15-60    | 15-64                  | 17-60            | 0-73                | 16-72               | 17-60                         | 16-60                    |
| CBF, No.                        | 164     | 106       | 81       | 247                    | 102              | 408                 | 112                 | 88                            | 142                      |
| Non-CBF, No.                    | 427     | 373       | 296      | 774                    | 552              | 2343                | 1032                | 719                           | 1037                     |
| CBF/Total, %                    | 27.7    | 22.1      | 21.5     | 24.2                   | 15.6             | 14.8                | 9.8                 | 10.9                          | 12.0                     |
| <i>P</i> value ( vs.<br>China1) |         | 0.035     | 0.029    | 0.114                  | <0.00<br>1       | <0.00<br>1          | <0.00<br>1          | <0.001                        | <0.001                   |
| <i>P</i> value ( vs.<br>China2) | 0.035   |           | 0.821    | 0.380                  | 0.005            | <0.00<br>1          | <0.00<br>1          | <0.001                        | <0.001                   |
| <i>P</i> value ( vs.<br>Korea)  | 0.029   | 0.821     |          | 0.289                  | 0.017            | 0.001               | <0.00<br>1          | <0.001                        | <0.001                   |
| <i>P</i> value ( vs.<br>JALSG)  | 0.114   | 0.380     | 0.289    |                        | <0.00<br>1       | <0.00<br>1          | <0.00<br>1          | <0.001                        | <0.001                   |

\* Data from our cohort (ChiCTR-TRC-10001202)

Abbreviations: CBF, core binding factor.

Table S2. NPM1 mutation ratios in European and our cohorts

|                              | China1* | China2[1] | MRC AML15<br>[5] | UK NCRI<br>AML17[6] | German<br>AML2003[8] |
|------------------------------|---------|-----------|------------------|---------------------|----------------------|
| Median age (years)           | 36      | 37        | 49               | 53                  | 48                   |
| Age range (years)            | 15-55   | 14-59     | 0-73             | 16-72               | 16-60                |
| NPM1 Mutant(No.)             | 89      | 64        | 200              | 320                 | 375                  |
| NPM1 Wildtype (No.)          | 471     | 416       | 517              | 783                 | 760                  |
| NPM1 Mutant/Total (%)        | 15.9    | 13.3      | 27.9             | 29.0                | 33.0                 |
| <i>P</i> value ( vs. China1) |         | 0.245     | <0.001           | <0.001              | <0.001               |
| <i>P</i> value ( vs. China2) | 0.245   |           | <0.001           | <0.001              | <0.001               |

\* Data from our cohort (ChiCTR-TRC-10001202)

Table S3. FLT3-ITD mutation ratios in European and our cohorts

|                             | China1* | China2[1] | MRC AML15<br>[5] | UK NCRI<br>AML17[6] |
|-----------------------------|---------|-----------|------------------|---------------------|
| Median age (years)          | 36      | 37        | 49               | 53                  |
| Age range (years)           | 15-55   | 14-59     | 0-73             | 16-72               |
| FLT3-ITD (No.)              | 66      | 67        | 206              | 200                 |
| Non-FLT3-ITD (No.)          | 522     | 447       | 630              | 920                 |
| FLT3-ITD /Total (%)         | 11.2    | 13.0      | 24.6             | 17.9                |
| <i>P</i> value( vs. China1) |         | 0.357     | <0.001           | <0.001              |
| <i>P</i> value( vs.China2)  | 0.357   |           | <0.001           | 0.014               |

\* Data from our cohort (ChiCTR-TRC-10001202)

Table S4. FLT3-ITD mutation ratios in older patients from Chinese cohort against European and American cohorts

|                            | China1* | MRC AML15<br>[5] | UK NCRI<br>AML17[6] |
|----------------------------|---------|------------------|---------------------|
| Median age (years)         | 46      | 49               | 53                  |
| Age range (years)          | 40-55   | 0-73             | 16-72               |
| FLT3-ITD (No.)             | 27      | 206              | 200                 |
| Non-FLT3-ITD (No.)         | 208     | 630              | 920                 |
| FLT3-ITD /Total (%)        | 11.5    | 24.6             | 17.9                |
| <i>P</i> value( vs. China) |         | <0.001           | 0.017               |

\* Data from our cohort (ChiCTR-TRC-10001202)

Table S5, CBF leukemia ratios in older patients from Japanese and Chinese cohorts against European and American cohorts

|                    | China1* | JALSG<br>AML95, 97<br>and 201[9] | ECOG1900<br>[4] | MRC<br>AML15 [5] | UK NCRI<br>AML17[6] | HOVON/SA<br>KK AML-<br>42 [7] | German<br>AML2003[8<br>] |
|--------------------|---------|----------------------------------|-----------------|------------------|---------------------|-------------------------------|--------------------------|
| Median age (years) | 46      | -                                | 48              | 49               | 53                  | 49                            | 48                       |
| Age range (years)  | 40-55   | 50-64                            | 17-60           | 0-73             | 16-72               | 17-60                         | 16-60                    |
| CBF (No.)          | 58      | 168                              | 102             | 408              | 112                 | 88                            | 142                      |
| Non-CBF (No.)      | 180     | 732                              | 555             | 2843             | 1094                | 772                           | 1037                     |
| CBF/Total (%)      | 24.4    | 18.7                             | 15.5            | 12.5             | 9.3                 | 10.2                          | 12                       |
| P value(vs. China) |         | 0.05                             | 0.002           | <0.001           | <0.001              | <0.001                        | <0.001                   |
| P value(vs. Japan) | 0.107   |                                  | 0.106           | <0.001           | <0.001              | <0.001                        | <0.001                   |

\* Data from our cohort (ChiCTR-TRC-10001202)

Abbreviations: CBF, CBF leukemia; NON-CBF, NON-CBF leukemia.

Table S6. NPM1 mutation ratios in older patients from Chinese cohort against European and American cohorts

|                       | China1* | MRC AML15<br>[5] | UK NCRI<br>AML17[6] | German<br>AML2003[8] |
|-----------------------|---------|------------------|---------------------|----------------------|
| Median age (years)    | 46      | 49               | 53                  | 48                   |
| Age range (years)     | 40-55   | 0-73             | 16-72               | 16-60                |
| NPM1 Mutant (No.)     | 53      | 200              | 320                 | 375                  |
| NPM1 Wildtype (No.)   | 172     | 517              | 783                 | 760                  |
| NPM1 Mutant/Total (%) | 23.6    | 27.9             | 29.0                | 33.0                 |
| P value ( vs. China)  |         | 0.2              | 0.097               | 0.005                |

\* Data from our cohort (ChiCTR-TRC-10001202)

Table S7. Outcomes in European, American, and Eastern Asian cohorts

|                                            | China1#                   | China2[1]                                | Korea [2] | JALSG<br>AML201[3]     | ECOG1900 [4]                         | MRC AML15 [5]                                    | UK NCRI<br>AML17[6]       | HOVON/SAKK<br>AML- 42 [7] | German<br>AML2003[8] |
|--------------------------------------------|---------------------------|------------------------------------------|-----------|------------------------|--------------------------------------|--------------------------------------------------|---------------------------|---------------------------|----------------------|
| Median age (years)                         | 36                        | 37                                       | 43        | 47                     | 48                                   | 49                                               | 53                        | 49                        | 48                   |
| Age range (years)                          | 15-55                     | 14-59                                    | 15-60     | 15-64                  | 17-60                                | 0-73                                             | 16-72                     | 17-60                     | 16-60                |
| <b>Overall</b>                             |                           |                                          |           |                        |                                      |                                                  |                           |                           |                      |
| CR rate (after two<br>course) (%)          | 82.1                      | 67.0                                     | 77.3      | 77.9                   | 63.9                                 | 78(DA)<br>82(ADE1*)<br>84(FLAG-Ida)<br>81(ADE2*) | 82                        | 80.7                      | 65                   |
| RFS (%)                                    | 55.4(SD)3y<br>66.7(ID)3y  | 37.9(DA)3y<br>48.8(HAA)3y<br>46.3(HAD)3y | 44.8(5y)  | 41(IDA)5y<br>41(DNR)5y |                                      | 35(DA)<br>32(ADE1*)<br>45(FLAG-Ida)<br>34(ADE2*) | 48(DA60)2y<br>51(DA90)2y  | NA                        | NA                   |
| OS (%)                                     | 59.3(DA)3y<br>67.7(HAA)3y | 42.7(DA)3y<br>44.5(HAA)3y<br>43.5(HAD)3y | 40.8(5y)  | 48(IDA)5y<br>48(DNR)5y | 23.7months& (HD)<br>15.7months& (SD) | 36(DA)<br>35(ADE1*)<br>44(FLAG-Ida)<br>37(ADE2*) | 60(DA60)2y<br>59(DA90)2y  | 40(ID)5y<br>42(HD)5y      | NA                   |
| <b>Cytogenetic favorable risk group</b>    |                           |                                          |           |                        |                                      |                                                  |                           |                           |                      |
| CR rate (%)                                | NA                        | NA                                       | 93.8      | 91(IDA)<br>96(DNR)     | 81.3                                 | NA                                               | NA                        | NA                        | NA                   |
| RFS (%)                                    | NA                        | NA                                       | 48.8(5y)  | NA                     |                                      | NA                                               | NA                        | NA                        | NA                   |
| OS (%)                                     | NA                        | NA                                       | 57.2(5y)  | NA                     |                                      | NA                                               | 100(DA60)2y<br>87(DA90)2y | 64(ID)5y<br>67(HD)5y      | NA                   |
| <b>Cytogenetic intermediate risk group</b> |                           |                                          |           |                        |                                      |                                                  |                           |                           |                      |

|                                       |    |                                         |          |                    |                                      |    |                          |                      |    |
|---------------------------------------|----|-----------------------------------------|----------|--------------------|--------------------------------------|----|--------------------------|----------------------|----|
| CR rate (%)                           | NA | NA                                      | 74.9     | 79(IDA)<br>76(DNR) | 58.7                                 | NA | NA                       | NA                   | NA |
| RFS (%)                               | NA | NA                                      | 47.5(5y) | NA                 |                                      | NA | NA                       | NA                   | NA |
| OS (%)                                | NA | NA                                      | 41.8(5y) | NA                 |                                      | NA | 64(DA60)2y<br>65(DA90)2y | 45(ID)5y<br>44(HD)5y | NA |
| <b>Cytogenetic adverse risk group</b> |    |                                         |          |                    |                                      |    |                          |                      |    |
| CR rate (%)                           | NA | NA                                      | 64.9     | 51(IDA)<br>43(DNR) | 51.4                                 | NA | NA                       | NA                   | NA |
| RFS (%)                               | NA | 71.4(DA)3y<br>NA(HAA)3y<br>60.0(HAD)3y  | 21.6(5y) | NA                 |                                      | NA | NA                       | NA                   | NA |
| OS (%)                                | NA | 41.2(DA)3y<br>7.5(HAA)3y<br>38.4(HAD)3y | 14.0(5y) | NA                 | 10.4months& (HD)<br>10.2months& (SD) | NA | 28(DA60)2y<br>23(DA90)2y | 31(ID)5y<br>30(HD)5y | NA |

---

Abbreviations: CBF, core binding factor. NA: Data are not available in the reports

\*: There are two ADE regimen group in that clinical trial.

&: There is only median survival in this report.

#: Data from our cohort (ChiCTR-TRC-10001202)

## Reference

1. Jin J, Wang JX, Chen FF, Wu DP, Hu J, Zhou JF, Hu JD, Wang JM, Li JY, HuangXJ, Ma J, Ji CY, Xu XP, Yu K, Ren HY, Zhou YH, Tong Y, Lou YJ, Ni WM, Tong HY, Wang HF, Mi YC, Du X, Chen BA, Shen Y, Chen Z, Chen SJ. Homoharringtonine-based induction regimens for patients with de-novo acute myeloid leukaemia: a multicentre, open-label, randomised, controlled phase 3 trial. *Lancet Oncol.* 2013;14(7):599-608.
2. Lee JH, Joo YD, Kim H, Bae SH, Kim MK, Zang DY, et al. Cooperative Study Group A for Hematology. A randomized trial comparing standard versus high-dose daunorubicin induction in patients with acute myeloid leukemia. *Blood.* 2011; 118:3832-41
3. Ohtake S, Miyawaki S, Fujita H, Kiyoi H, Shinagawa K, Usui N, et al. Randomized study of induction therapy comparing standard-dose idarubicin with high-dose daunorubicin in adult patients with previously untreated acute myeloid leukemia: the JALSG AML201 Study. *Blood.* 2011; 117:2358-65
4. Fernandez HF, Sun Z, Yao X, Litzow MR, Luger SM, Paietta EM, et al. Anthracycline dose intensification in acute myeloid leukemia. *N Engl J Med.* 2009; 361:1249-59
5. Burnett AK, Russell NH, Hills RK, Hunter AE, Kjeldsen L, Yin J, et al. Optimization of chemotherapy for younger patients with acute myeloid leukemia: results of the medical research council AML15 trial. *J Clin Oncol.* 2013; 31:3360-8
6. Burnett AK, Russell NH, Hills RK, Kell J, Cavenagh J, Kjeldsen L, et al. A randomized comparison of daunorubicin 90 mg/m<sup>2</sup> vs 60 mg/m<sup>2</sup> in AML induction: results from the UK NCRI AML17 trial in 1206 patients. *Blood.* 2015; 125:3878-85
7. Löwenberg B, Pabst T, Vellenga E, van Putten W, Schouten HC, Graux C, et al. Cytarabine dose for acute myeloid leukemia. *N Engl J Med.* 2011; 364:1027-36.
8. Schaich M, Parmentier S, Kramer M, Illmer T, Stölzel F, Röllig C, et al. High-dose cytarabine consolidation with or without additional amsacrine and mitoxantrone in acute myeloid leukemia: results of the prospective randomized AML2003 trial. *J Clin Oncol.* 2013; 31:2094-102
9. Yanada M, Ohtake S, Miyawaki S, Sakamaki H, Sakura T, Maeda T, et al. The demarcation between younger and older acute myeloid leukemia patients: a pooled analysis of 3 prospective studies. *Cancer.* 2013; 119:3326-3333.
